# Supplementary material for: Cytosine Methylation in Genomic DNA and Characterization of DNA Methylases and Demethylases and Their Expression Profiles in Viroid-Infected Hop Plants (Humulus lupulus Var. ‘Celeia’)
Source: MDPI journal article supplement (doi:10.3390/cells11162592), 2022-08-19
Supplement: s1 [file s1]

## Supplementary Figures

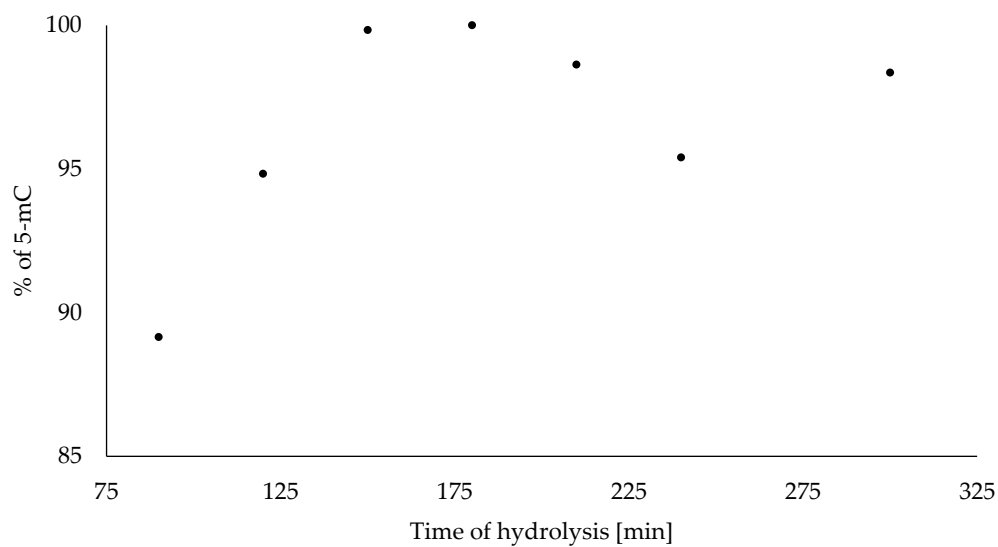

**Supplementary Figure S1:** Percentage of 5-methylcytosine relative to that of 180 minutes of hydrolysis time.

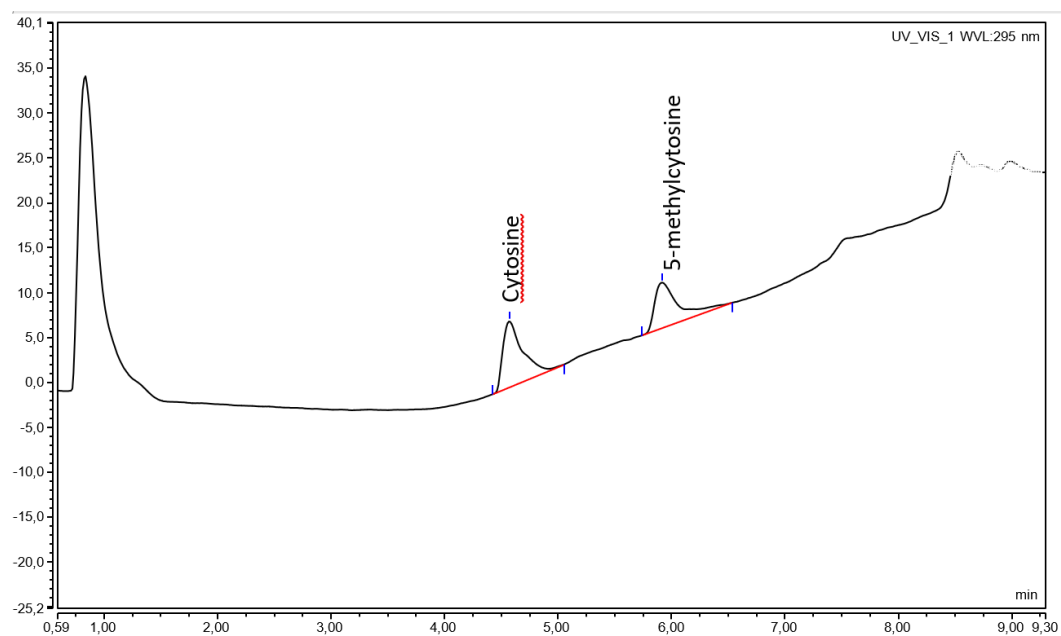

**Supplementary Figure S2:** HPLC chromatogram of the hydrolysed DNA samples. Two distinct peaks belonging to cytosine and 5-methylcytosine are shown.

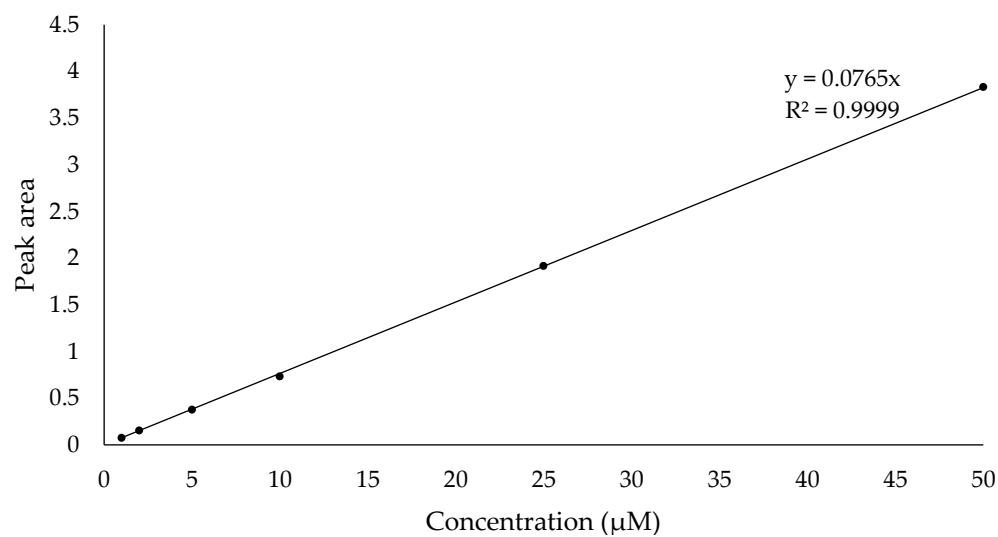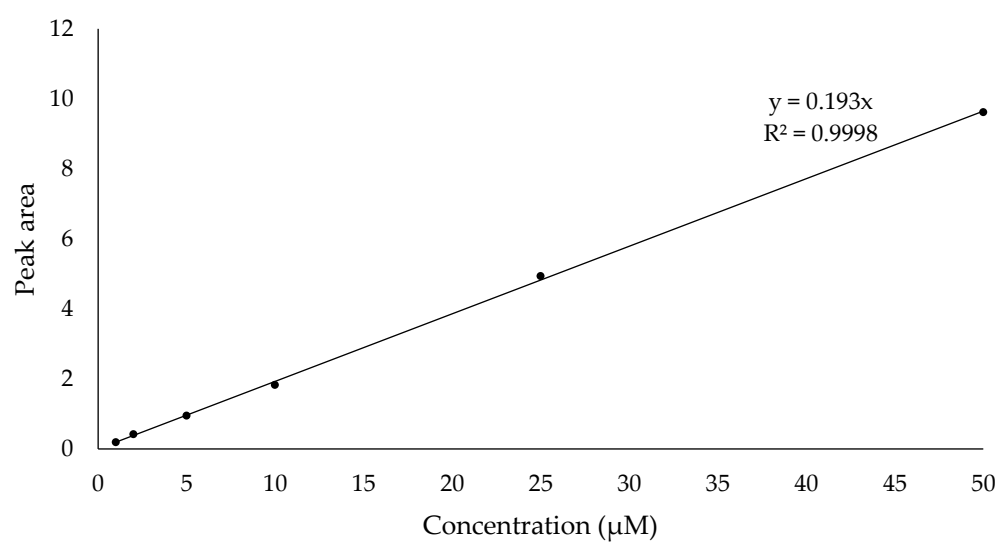

**Supplementary Figure S3.** Linearity of the HPLC method (Figure A-cytosine and Figure B-methyl-cytosine).
