# Supplementary material for: Cytosine Methylation in Genomic DNA and Characterization of DNA Methylases and Demethylases and Their Expression Profiles in Viroid-Infected Hop Plants (Humulus lupulus Var. ‘Celeia’)
Source: Cells. 2022 Aug 19;11(16):2592. doi: 10.3390/cells11162592 (PMC9406385; doi:10.3390/cells11162592)
Supplement: Supplementary file 1 [file cells-11-02592-s001.zip › Supplementary Tables.XLSX]

## Sheet: Supplementary Table S1
Supplementary Table S1. RT-PCR Cq values of viroid detected and % 5-mC estimated by HPLC-UV in each inspected hop plant.
Hop plants infected with	Plant	RT-qPCR (Cq)			% 5-mC	Average % 5-mC	Statistical group (% 5-mC)
		CBCVd	HLVd	HSVd
Viroid-free	Plant 1	NP1	NP1	NP1	27.3	26.7	B
	Plant 2	NP1	NP1	NP1	27.8
	Plant 3	NP1	NP1	NP1	25.1
Citrus bark cracking viroid (CBCVd)	Plant 1	18.5	NP1	NP1	26.7	27.3	B
	Plant 2	16.8	NP1	NP1	26.8
	Plant 3	16.7	NP1	NP1	26.8
Hop latent viroid (HLVd)	Plant 1	NP1	10.8	NP1	28.4	31.4	A
	Plant 2	NP1	17.2	NP1	32
	Plant 3	NP1	26.8	NP1	33.7
Hop stunt viroid (HSVd)	Plant 1	NP1	NP1	26.8	26.1	25.7	BC
	Plant 2	NP1	NP1	19	25.4
	Plant 3	NP1	NP1	20.2	27.2
	Plant 4	NP1	NP1	33.5	24.1
CBCVd+HLVd	Plant 1	17.1	33.9	NP1	28.2	27.6	B
	Plant 2	17.6	33.1	NP1	28
	Plant 3	17.6	18.7	NP1	27.3
CBCVd+HLVd+HSVd	Plant 1	17	36.5	32.2	21.4	23.7	C
	Plant 2	16.7	34.9	33	26
	Plant 3	18.9	33	32	24.6
	Plant 4	23.6	27.2	30.6	25.2
1 NP: not present – undetermined in qPCR.

## Sheet: Supplementary Table S2
Supplementary Table S2. Retreived protein sequences of selected plant species from UniProtKB databse
DNA (de)methylase	Name	Description	Size
Chromomethylase (CMT)	sp|Q94F88|	CMT3_ARATH DNA (cytosine-5)-methyltransferase CMT3 OS=Arabidopsis thaliana OX=3702 GN=CMT3 PE=1 SV=2	839
	sp|O49139|	CMT1_ARATH Putative DNA (cytosine-5)-methyltransferase CMT1 OS=Arabidopsis thaliana OX=3702 GN=CMT1 PE=5 SV=2	791
	sp|Q94F87|	CMT2_ARATH DNA (cytosine-5)-methyltransferase CMT2 OS=Arabidopsis thaliana OX=3702 GN=CMT2 PE=2 SV=3	1295
	tr|A0A072UBK7|	A0A072UBK7_MEDTR DNA (Cytosine-5)-methyltransferase CMT3-like protein OS=Medicago truncatula OX=3880 GN=25496971 PE=3 SV=1	935
	tr|A0A6J0ZT59|	A0A6J0ZT59_9ROSI DNA (Cytosine-5)-methyltransferase CMT2-like isoform X2 OS=Herrania umbratica OX=108875 GN=LOC110411869 PE=3 SV=1	1420
	tr|G7ZY08|	G7ZY08_MEDTR DNA (Cytosine-5)-methyltransferase CMT3-like protein OS=Medicago truncatula OX=3880 GN=25497416 PE=3 SV=1	827
	tr|G7K003|	G7K003_MEDTR DNA (Cytosine-5)-methyltransferase CMT3-like protein OS=Medicago truncatula OX=3880 GN=11416506 PE=3 SV=1	835
	tr|A0A072UC70|	A0A072UC70_MEDTR DNA (Cytosine-5)-methyltransferase CMT3-like protein OS=Medicago truncatula OX=3880 GN=25496870 PE=3 SV=1	835
	tr|A0A072UIN2|	A0A072UIN2_MEDTR DNA (Cytosine-5)-methyltransferase CMT1 OS=Medicago truncatula OX=3880 GN=25491491 PE=3 SV=1	843
	tr|K7S882|	K7S882_MALDO CMT-type cytosine DNA-methyltransferase 3b OS=Malus domestica OX=3750 PE=2 SV=1	1096
	tr|A0A445M491|	A0A445M491_GLYSO DNA (Cytosine-5)-methyltransferase CMT3 isoform A OS=Glycine soja OX=3848 GN=D0Y65_001699 PE=3 SV=1	833
	tr|A0A445HYQ9|	A0A445HYQ9_GLYSO DNA (Cytosine-5)-methyltransferase CMT3 OS=Glycine soja OX=3848 GN=D0Y65_029342 PE=3 SV=1	832
	tr|A0A445GGS4|	A0A445GGS4_GLYSO DNA (Cytosine-5)-methyltransferase CMT2 isoform D OS=Glycine soja OX=3848 GN=D0Y65_043281 PE=3 SV=1	1093
	tr|A0A445M3N4|	A0A445M3N4_GLYSO DNA (Cytosine-5)-methyltransferase CMT3 isoform B OS=Glycine soja OX=3848 GN=D0Y65_001699 PE=3 SV=1	776
	tr|A0A445GGU0|	A0A445GGU0_GLYSO DNA (Cytosine-5)-methyltransferase CMT2 isoform B OS=Glycine soja OX=3848 GN=D0Y65_043281 PE=3 SV=1	1084
	tr|A0A2I4FSJ3|	A0A2I4FSJ3_JUGRE DNA (Cytosine-5)-methyltransferase CMT3 OS=Juglans regia OX=51240 GN=LOC109001682 PE=3 SV=1	836
	tr|A0A072UCS9|	A0A072UCS9_MEDTR DNA (Cytosine-5)-methyltransferase CMT3-like protein OS=Medicago truncatula OX=3880 GN=11416506 PE=3 SV=1	830
	tr|A0A2I4DHF4|	A0A2I4DHF4_JUGRE DNA (Cytosine-5)-methyltransferase CMT2-like isoform X1 OS=Juglans regia OX=51240 GN=LOC108980189 PE=3 SV=1	1236
	tr|A0A1S3EFG0|	A0A1S3EFG0_CICAR putative DNA (Cytosine-5)-methyltransferase CMT1 OS=Cicer arietinum OX=3827 GN=LOC101493801 PE=3 SV=1	826
	tr|A0A2I4DHG9|	A0A2I4DHG9_JUGRE DNA (Cytosine-5)-methyltransferase CMT2-like isoform X6 OS=Juglans regia OX=51240 GN=LOC108980189 PE=3 SV=1	1174
	tr|A0A2I4DHG8|	A0A2I4DHG8_JUGRE DNA (Cytosine-5)-methyltransferase CMT2-like isoform X5 OS=Juglans regia OX=51240 GN=LOC108980189 PE=3 SV=1	1179
	tr|A0A2I4DHG5|	A0A2I4DHG5_JUGRE DNA (Cytosine-5)-methyltransferase CMT2-like isoform X4 OS=Juglans regia OX=51240 GN=LOC108980189 PE=3 SV=1	1217
	tr|A0A6J0MJ81|	A0A6J0MJ81_RAPSA DNA (Cytosine-5)-methyltransferase CMT2 isoform X1 OS=Raphanus sativus OX=3726 GN=LOC108843473 PE=3 SV=1	1182
	tr|A0A6P4MC74|	A0A6P4MC74_GOSAR DNA (Cytosine-5)-methyltransferase CMT3 isoform X1 OS=Gossypium arboreum OX=29729 GN=LOC108453647 PE=3 SV=1	907
	tr|A0A6J0MI61|	A0A6J0MI61_RAPSA DNA (Cytosine-5)-methyltransferase CMT2 isoform X2 OS=Raphanus sativus OX=3726 GN=LOC108843473 PE=3 SV=1	1160
	tr|A0A6P4M457|	A0A6P4M457_GOSAR DNA (Cytosine-5)-methyltransferase CMT3 isoform X3 OS=Gossypium arboreum OX=29729 GN=LOC108453647 PE=3 SV=1	903
	tr|A0A6P4AVH0|	A0A6P4AVH0_ZIZJJ DNA (Cytosine-5)-methyltransferase CMT2-like isoform X3 OS=Ziziphus jujuba OX=326968 GN=LOC107434359 PE=3 SV=1	1058
	tr|A0A6P4M443|	A0A6P4M443_GOSAR DNA (Cytosine-5)-methyltransferase CMT3 isoform X2 OS=Gossypium arboreum OX=29729 GN=LOC108453647 PE=3 SV=1	906
	tr|A0A6P4NQ91|	A0A6P4NQ91_GOSAR DNA (Cytosine-5)-methyltransferase CMT2 isoform X3 OS=Gossypium arboreum OX=29729 GN=LOC108469875 PE=3 SV=1	1087
	tr|A0A6J1JL36|	A0A6J1JL36_CUCMA DNA (Cytosine-5)-methyltransferase CMT3-like isoform X1 OS=Cucurbita maxima OX=3661 GN=LOC111485397 PE=3 SV=1	695
	tr|A0A6P5T3X4|	A0A6P5T3X4_PRUAV DNA (Cytosine-5)-methyltransferase CMT3 isoform X1 OS=Prunus avium OX=42229 GN=LOC110762998 PE=3 SV=1	870
	tr|A0A371HAT9|	A0A371HAT9_MUCPR DNA (Cytosine-5)-methyltransferase CMT3 (Fragment) OS=Mucuna pruriens OX=157652 GN=CMT3 PE=3 SV=1	699
	tr|A0A6J1AHL2|	A0A6J1AHL2_9ROSI putative DNA (Cytosine-5)-methyltransferase CMT1 OS=Herrania umbratica OX=108875 GN=LOC110418005 PE=3 SV=1	844
	tr|A0A6J0ZTH9|	A0A6J0ZTH9_9ROSI DNA (Cytosine-5)-methyltransferase CMT2-like isoform X1 OS=Herrania umbratica OX=108875 GN=LOC110411869 PE=3 SV=1	1182
	tr|A0A6P9E470|	A0A6P9E470_JUGRE DNA (Cytosine-5)-methyltransferase CMT2-like isoform X2 OS=Juglans regia OX=51240 GN=LOC108980189 PE=3 SV=1	1224
	tr|A0A6P9EH73|	A0A6P9EH73_JUGRE DNA (Cytosine-5)-methyltransferase CMT2-like isoform X3 OS=Juglans regia OX=51240 GN=LOC108980189 PE=3 SV=1	1218
	tr|A0A6P5NED2|	A0A6P5NED2_ARADU DNA (Cytosine-5)-methyltransferase CMT2 isoform X2 OS=Arachis duranensis OX=130453 GN=LOC107479097 PE=3 SV=1	921
	tr|A0A6P5Y6B2|	A0A6P5Y6B2_DURZI DNA (Cytosine-5)-methyltransferase CMT2-like isoform X3 OS=Durio zibethinus OX=66656 GN=LOC111289302 PE=3 SV=1	1170
	tr|A0A6P5SYM6|	A0A6P5SYM6_PRUAV DNA (Cytosine-5)-methyltransferase CMT3 isoform X2 OS=Prunus avium OX=42229 GN=LOC110762998 PE=3 SV=1	867
	tr|A0A072U860|	A0A072U860_MEDTR DNA (Cytosine-5)-methyltransferase CMT1 OS=Medicago truncatula OX=3880 GN=MTR_6g037900 PE=3 SV=1	843
	tr|A0A7J6H953|	A0A7J6H953_CANSA Cytosine-specific methyltransferase OS=Cannabis sativa OX=3483 GN=F8388_017389 PE=3 SV=1	985
	tr|A0A7J6I2N7|	A0A7J6I2N7_CANSA Cytosine-specific methyltransferase OS=Cannabis sativa OX=3483 GN=G4B88_000831 PE=3 SV=1	1175
	tr|A0A2K3NTX5|	A0A2K3NTX5_TRIPR DNA (Cytosine-5)-methyltransferase cmt3-like protein OS=Trifolium pratense OX=57577 GN=L195_g002957 PE=3 SV=1	883
	tr|T1WH19|	T1WH19_CITSI CMT-type DNA-methyltransferase OS=Citrus sinensis OX=2711 PE=2 SV=1	869
	tr|W9SFR4|	W9SFR4_9ROSA DNA (Cytosine-5)-methyltransferase CMT2 OS=Morus notabilis OX=981085 GN=L484_022822 PE=3 SV=1	1399
	tr|A0A315AAW4|	A0A315AAW4_PRUYE DNA (Cytosine-5)-methyltransferase CMT3 OS=Prunus yedoensis var. nudiflora OX=2094558 GN=Pyn_33299 PE=3 SV=1	870
	tr|A0A6A1WRX1|	A0A6A1WRX1_9ROSI DNA (Cytosine-5)-methyltransferase CMT3 OS=Morella rubra OX=262757 GN=CJ030_MR1G013794 PE=3 SV=1	847
	tr|A0A6A2ZHC6|	A0A6A2ZHC6_HIBSY DNA (Cytosine-5)-methyltransferase CMT3 OS=Hibiscus syriacus OX=106335 GN=F3Y22_tig00110893pilonHSYRG00458 PE=3 SV=1	855
	tr|A0A5N5GTB2|	A0A5N5GTB2_9ROSA DNA (Cytosine-5)-methyltransferase CMT3-like OS=Pyrus ussuriensis x Pyrus communis OX=2448454 GN=D8674_023018 PE=3 SV=1	856
	tr|A0A6A1VTU4|	A0A6A1VTU4_9ROSI DNA (Cytosine-5)-methyltransferase CMT2 OS=Morella rubra OX=262757 GN=CJ030_MR4G006391 PE=3 SV=1	1049
	tr|A0A2P5AZ43|	A0A2P5AZ43_PARAD C-5 cytosine methyltransferase OS=Parasponia andersonii OX=3476 GN=PanWU01x14_286680 PE=3 SV=1	751
	tr|A0A2P5FAA8|	A0A2P5FAA8_TREOI C-5 cytosine methyltransferase OS=Trema orientale OX=63057 GN=TorRG33x02_094950 PE=3 SV=1	773
Demethylase (DME)	sp|Q8LK56|	DME_ARATH Transcriptional activator DEMETER OS=Arabidopsis thaliana OX=3702 GN=DME PE=1 SV=2	1987
	sp|Q9SR66|	DML2_ARATH DEMETER-like protein 2 OS=Arabidopsis thaliana OX=3702 GN=DML2 PE=3 SV=2	1332
	tr|A0A0D3EHU4|	A0A0D3EHU4_BRAOL ENDO3c domain-containing protein OS=Brassica oleracea var. oleracea OX=109376 GN=106318051 PE=3 SV=1	1908
	tr|A0A059ACQ3|	A0A059ACQ3_EUCGR ENDO3c domain-containing protein OS=Eucalyptus grandis OX=71139 GN=EUGRSUZ_J01016 PE=3 SV=1	1884
	tr|D7LXK5|	D7LXK5_ARALL ENDO3c domain-containing protein OS=Arabidopsis lyrata subsp. lyrata OX=81972 GN=ARALYDRAFT_487239 PE=3 SV=1	1997
	tr|A0A7J6ER17|	A0A7J6ER17_CANSA ENDO3c domain-containing protein OS=Cannabis sativa OX=3483 GN=F8388_015979 PE=3 SV=1	1857
	tr|A0A803PTL8|	A0A803PTL8_CANSA ENDO3c domain-containing protein OS=Cannabis sativa OX=3483 PE=3 SV=1	2305
	tr|D7LJ45|	D7LJ45_ARALL ENDO3c domain-containing protein OS=Arabidopsis lyrata subsp. lyrata OX=81972 GN=ARALYDRAFT_482629 PE=3 SV=1	1432
	tr|K7LZV9|	K7LZV9_SOYBN ENDO3c domain-containing protein OS=Glycine max OX=3847 GN=100779756 PE=3 SV=1	1993
	tr|A0A0S3ST49|	A0A0S3ST49_PHAAN ENDO3c domain-containing protein OS=Vigna angularis var. angularis OX=157739 GN=Vigan.08G284400 PE=3 SV=1	2084
	tr|A0A803NWS7|	A0A803NWS7_CANSA ENDO3c domain-containing protein OS=Cannabis sativa OX=3483 PE=3 SV=1	1863
	tr|A0A803NFP6|	A0A803NFP6_CANSA ENDO3c domain-containing protein OS=Cannabis sativa OX=3483 PE=3 SV=1	1900
	tr|A0A7N2M4Z8|	A0A7N2M4Z8_QUELO ENDO3c domain-containing protein OS=Quercus lobata OX=97700 PE=3 SV=1	1837
	tr|A0A7N2LEY5|	A0A7N2LEY5_QUELO ENDO3c domain-containing protein OS=Quercus lobata OX=97700 PE=3 SV=1	1951
	tr|A0A5N5LMU6|	A0A5N5LMU6_9ROSI ENDO3c domain-containing protein OS=Salix brachista OX=2182728 GN=DKX38_012169 PE=3 SV=1	1893
	tr|V7BKY3|	V7BKY3_PHAVU ENDO3c domain-containing protein OS=Phaseolus vulgaris OX=3885 GN=PHAVU_007G223600g PE=3 SV=1	2209
	tr|V7CXE1|	V7CXE1_PHAVU ENDO3c domain-containing protein OS=Phaseolus vulgaris OX=3885 GN=PHAVU_001G186500g PE=3 SV=1	1689
	tr|A0A0D2V0G5|	A0A0D2V0G5_GOSRA ENDO3c domain-containing protein OS=Gossypium raimondii OX=29730 GN=B456_009G408300 PE=3 SV=1	1893
	tr|A0A059DFR3|	A0A059DFR3_EUCGR ENDO3c domain-containing protein OS=Eucalyptus grandis OX=71139 GN=EUGRSUZ_A01547 PE=3 SV=1	1851
	tr|F6HKH6|	F6HKH6_VITVI ENDO3c domain-containing protein OS=Vitis vinifera OX=29760 GN=VIT_08s0007g03920 PE=3 SV=1	1775
	tr|A0A0A0LAQ7|	A0A0A0LAQ7_CUCSA ENDO3c domain-containing protein OS=Cucumis sativus OX=3659 GN=Csa_3G748840 PE=3 SV=1	1851
	tr|A0A059AAK2|	A0A059AAK2_EUCGR ENDO3c domain-containing protein OS=Eucalyptus grandis OX=71139 GN=EUGRSUZ_J00426 PE=3 SV=1	1255
	tr|V4S7T4|	V4S7T4_CITCL ENDO3c domain-containing protein OS=Citrus clementina OX=85681 GN=CICLE_v10010892mg PE=3 SV=1	1964
	tr|V4SAT0|	V4SAT0_CITCL ENDO3c domain-containing protein OS=Citrus clementina OX=85681 GN=CICLE_v10027676mg PE=3 SV=1	1762
	tr|A0A0D2RX48|	A0A0D2RX48_GOSRA ENDO3c domain-containing protein OS=Gossypium raimondii OX=29730 GN=B456_006G158300 PE=3 SV=1	1949
	tr|A0A251NCE1|	A0A251NCE1_PRUPE ENDO3c domain-containing protein OS=Prunus persica OX=3760 GN=PRUPE_7G118000 PE=3 SV=1	1754
	tr|A0A251N4F8|	A0A251N4F8_PRUPE ENDO3c domain-containing protein OS=Prunus persica OX=3760 GN=PRUPE_7G005000 PE=3 SV=1	1993
	tr|A0A1R3IHL2|	A0A1R3IHL2_COCAP ENDO3c domain-containing protein OS=Corchorus capsularis OX=210143 GN=CCACVL1_12092 PE=3 SV=1	1768
	tr|A5BYI7|	A5BYI7_VITVI ENDO3c domain-containing protein OS=Vitis vinifera OX=29760 GN=VITISV_035357 PE=3 SV=1	1824
	tr|A0A6P8DF87|	A0A6P8DF87_PUNGR DNA glycosylase/AP lyase ROS1-like isoform X2 OS=Punica granatum OX=22663 GN=LOC116206626 PE=3 SV=1	1764
	tr|A0A6P8DLJ7|	A0A6P8DLJ7_PUNGR DNA glycosylase/AP lyase ROS1-like isoform X1 OS=Punica granatum OX=22663 GN=LOC116206626 PE=3 SV=1	1851
	tr|A0A061FW36|	A0A061FW36_THECC DNA N-glycosylase/DNA-(Apurinic or apyrimidinic site) lyase, putative isoform 2 OS=Theobroma cacao OX=3641 GN=TCM_043681 PE=3 SV=1	1999
	tr|A0A061FPP2|	A0A061FPP2_THECC DNA N-glycosylase/DNA-(Apurinic or apyrimidinic site) lyase, putative isoform 3 OS=Theobroma cacao OX=3641 GN=TCM_043681 PE=3 SV=1	1979
	tr|A0A061FQU9|	A0A061FQU9_THECC DNA N-glycosylase/DNA-(Apurinic or apyrimidinic site) lyase, putative isoform 5 OS=Theobroma cacao OX=3641 GN=TCM_043681 PE=3 SV=1	1978
	tr|A0A061FQ47|	A0A061FQ47_THECC DNA N-glycosylase/DNA-(Apurinic or apyrimidinic site) lyase, putative isoform 1 OS=Theobroma cacao OX=3641 GN=TCM_043681 PE=3 SV=1	1966
	tr|A0A396JSS2|	A0A396JSS2_MEDTR Putative DNA-(Apurinic or apyrimidinic site) lyase OS=Medicago truncatula OX=3880 GN=MtrunA17_Chr1g0198151 PE=3 SV=1	1783
	tr|A0A072U329|	A0A072U329_MEDTR HhH-GPD base excision DNA repair family protein OS=Medicago truncatula OX=3880 GN=MTR_7g103680 PE=3 SV=1	1778
	tr|A0A2P6RBI1|	A0A2P6RBI1_ROSCH Putative DNA glycosylase, helix-turn-helix, base-excision DNA repair, demeter OS=Rosa chinensis OX=74649 GN=RchiOBHm_Chr3g0472091 PE=3 SV=1	1717
	tr|A0A2P6PPX8|	A0A2P6PPX8_ROSCH Putative DNA glycosylase, helix-turn-helix, base-excision DNA repair, demeter OS=Rosa chinensis OX=74649 GN=RchiOBHm_Chr6g0267361 PE=3 SV=1	1483
	tr|A0A2P5DPS1|	A0A2P5DPS1_TREOI DNA glycosylase OS=Trema orientale OX=63057 GN=TorRG33x02_245590 PE=3 SV=1	1297
	tr|A0A6A4NKL5|	A0A6A4NKL5_LUPAL Putative A/G-specific adenine glycosylase MutY, DNA glycosylase, demeter, domain-containing protein OS=Lupinus albus OX=3870 GN=Lalb_Chr21g0315671 PE=3 SV=1	2070
	tr|A0A6A4R9C5|	A0A6A4R9C5_LUPAL Putative DNA glycosylase, helix-turn-helix, base-excision DNA repair, demeter OS=Lupinus albus OX=3870 GN=Lalb_Chr01g0018331 PE=3 SV=1	1706
	tr|A0A396JTG3|	A0A396JTG3_MEDTR Putative DNA glycosylase, helix-turn-helix, base-excision DNA repair, demeter OS=Medicago truncatula OX=3880 GN=MtrunA17_Chr1g0179341 PE=3 SV=1	2228
	tr|A0A396H9Z3|	A0A396H9Z3_MEDTR Putative DNA glycosylase, helix-turn-helix, base-excision DNA repair, demeter OS=Medicago truncatula OX=3880 GN=MtrunA17_Chr7g0265771 PE=3 SV=1	1801
	tr|A0A4Y1RRI4|	A0A4Y1RRI4_PRUDU HhH-GPD base excision DNA repair family protein OS=Prunus dulcis OX=3755 GN=Prudu_018678 PE=3 SV=1	2013
	tr|A0A4Y1RTM7|	A0A4Y1RTM7_PRUDU HhH-GPD base excision DNA repair family protein OS=Prunus dulcis OX=3755 GN=Prudu_019709 PE=3 SV=1	1748
	tr|F6KFZ1|	F6KFZ1_GOSHI DNA N-glycosylase/DNA-(Apurinic or apyrimidinic site) lyase (Fragment) OS=Gossypium hirsutum OX=3635 PE=2 SV=1	2055
	tr|A0A2P5EHW2|	A0A2P5EHW2_TREOI DNA glycosylase OS=Trema orientale OX=63057 GN=TorRG33x02_190770 PE=3 SV=1	1882
	tr|A0A2P6R7D1|	A0A2P6R7D1_ROSCH Putative DNA glycosylase, helix-turn-helix, base-excision DNA repair, demeter OS=Rosa chinensis OX=74649 GN=RchiOBHm_Chr3g0456611 PE=3 SV=1	776
DNA methyltransferase (DNMT)	sp|P34881|	DNMT1_ARATH DNA (cytosine-5)-methyltransferase 1 OS=Arabidopsis thaliana OX=3702 GN=DMT1 PE=1 SV=1	1534
	sp|O23273|	DNMT4_ARATH DNA (cytosine-5)-methyltransferase 4 OS=Arabidopsis thaliana OX=3702 GN=MET4 PE=1 SV=1	1519
	sp|Q9T0I1|	DNMT3_ARATH DNA (cytosine-5)-methyltransferase 3 OS=Arabidopsis thaliana OX=3702 GN=MET3 PE=3 SV=1	1404
	tr|A0A1P8BCY7|	A0A1P8BCY7_ARATH DNA (cytosine-5)-methyltransferase OS=Arabidopsis thaliana OX=3702 GN=MET1 PE=1 SV=1	1446
	sp|Q9M0S8|	DNMT2_ARATH DNA (cytosine-5)-methyltransferase 2 OS=Arabidopsis thaliana OX=3702 GN=MET2 PE=2 SV=1	1512
	tr|D7MN85|	D7MN85_ARALL DNA (cytosine-5)-methyltransferase OS=Arabidopsis lyrata subsp. lyrata OX=81972 GN=ARALYDRAFT_331330 PE=3 SV=1	1532
	tr|A0A2I4EPV3|	A0A2I4EPV3_JUGRE DNA (cytosine-5)-methyltransferase OS=Juglans regia OX=51240 GN=LOC108991565 PE=3 SV=1	1576
	tr|A0A1S3CM89|	A0A1S3CM89_CUCME DNA (cytosine-5)-methyltransferase OS=Cucumis melo OX=3656 GN=LOC103502549 PE=3 SV=1	1550
	tr|A0A0L9VI80|	A0A0L9VI80_PHAAN DNA (cytosine-5)-methyltransferase OS=Phaseolus angularis OX=3914 GN=LR48_Vigan10g058500 PE=3 SV=1	1666
	tr|A0A6P3ZL43|	A0A6P3ZL43_ZIZJJ DNA (cytosine-5)-methyltransferase OS=Ziziphus jujuba OX=326968 GN=LOC107415803 PE=3 SV=1	1559
	tr|A0A6J1DZ37|	A0A6J1DZ37_MOMCH DNA (cytosine-5)-methyltransferase OS=Momordica charantia OX=3673 GN=LOC111025596 PE=3 SV=1	1552
	tr|C4P086|	C4P086_FRAAN DNA (cytosine-5)-methyltransferase OS=Fragaria ananassa OX=3747 GN=MET1a PE=2 SV=1	1565
	tr|C4P087|	C4P087_FRAAN DNA (cytosine-5)-methyltransferase OS=Fragaria ananassa OX=3747 GN=MET1b PE=2 SV=1	1557
	tr|Q05KC4|	Q05KC4_BRACM DNA (cytosine-5)-methyltransferase OS=Brassica campestris OX=3711 GN=BrMET1a PE=3 SV=1	1528
	tr|A0A6D2IRV2|	A0A6D2IRV2_9BRAS DNA (cytosine-5)-methyltransferase OS=Microthlaspi erraticum OX=1685480 GN=MERR_LOCUS15074 PE=3 SV=1	1566
	tr|A0A0A0KPF1|	A0A0A0KPF1_CUCSA DNA (cytosine-5)-methyltransferase OS=Cucumis sativus OX=3659 GN=Csa_5G002610 PE=3 SV=1	1550
	tr|A0A2P6QFF2|	A0A2P6QFF2_ROSCH DNA (cytosine-5)-methyltransferase OS=Rosa chinensis OX=74649 GN=RchiOBHm_Chr5g0051581 PE=3 SV=1	1566
	tr|R0GM97|	R0GM97_9BRAS DNA (cytosine-5)-methyltransferase OS=Capsella rubella OX=81985 GN=CARUB_v10006424mg PE=3 SV=1	1489
	tr|A0A5A7VJ57|	A0A5A7VJ57_CUCME DNA (cytosine-5)-methyltransferase OS=Cucumis melo var. makuwa OX=1194695 GN=E5676_scaffold76G00480 PE=3 SV=1	1541
	tr|A0A178V3U1|	A0A178V3U1_ARATH DNA (cytosine-5)-methyltransferase OS=Arabidopsis thaliana OX=3702 GN=AXX17_At4g15530 PE=3 SV=1	1507
	tr|I1JXB2|	I1JXB2_SOYBN DNA (cytosine-5)-methyltransferase OS=Glycine max OX=3847 GN=100802765 PE=3 SV=2	1551
	tr|A0A7G2EX10|	A0A7G2EX10_ARATH DNA (cytosine-5)-methyltransferase OS=Arabidopsis thaliana OX=3702 GN=AT9943_LOCUS15489 PE=3 SV=1	1445
	tr|A0A654FNT5|	A0A654FNT5_ARATH DNA (cytosine-5)-methyltransferase OS=Arabidopsis thaliana OX=3702 GN=AN1_LOCUS17975 PE=3 SV=1	1462
	tr|I1KCC0|	I1KCC0_SOYBN DNA (cytosine-5)-methyltransferase OS=Glycine max OX=3847 GN=100797667 PE=3 SV=2	1555
	tr|G7KP96|	G7KP96_MEDTR DNA (cytosine-5)-methyltransferase OS=Medicago truncatula OX=3880 GN=11408961 PE=3 SV=2	1553
	tr|A0A023INJ5|	A0A023INJ5_POPTO DNA (cytosine-5)-methyltransferase OS=Populus tomentosa OX=118781 PE=3 SV=1	1597
	tr|A0A2N9II46|	A0A2N9II46_FAGSY DNA (cytosine-5)-methyltransferase OS=Fagus sylvatica OX=28930 GN=FSB_LOCUS52010 PE=3 SV=1	1396
	tr|A0A7J7D8L7|	A0A7J7D8L7_TRIWF DNA (cytosine-5)-methyltransferase OS=Tripterygium wilfordii OX=458696 GN=HS088_TW09G00679 PE=3 SV=1	1476
	tr|B9RWB0|	B9RWB0_RICCO DNA (cytosine-5)-methyltransferase OS=Ricinus communis OX=3988 GN=RCOM_1176970 PE=3 SV=1	1542
	tr|M4FFR5|	M4FFR5_BRARP DNA (cytosine-5)-methyltransferase OS=Brassica rapa subsp. pekinensis OX=51351 PE=3 SV=1	1528
	tr|A0A1U8M9L1|	A0A1U8M9L1_GOSHI DNA (cytosine-5)-methyltransferase OS=Gossypium hirsutum OX=3635 GN=LOC107934345 PE=3 SV=1	1561
	tr|A0A0B0MFQ2|	A0A0B0MFQ2_GOSAR DNA (cytosine-5)-methyltransferase OS=Gossypium arboreum OX=29729 GN=LOC108460481 PE=3 SV=1	1571
	tr|B9SPD5|	B9SPD5_RICCO DNA (cytosine-5)-methyltransferase OS=Ricinus communis OX=3988 GN=RCOM_0497320 PE=3 SV=1	1584
	tr|A0A1U8PJN5|	A0A1U8PJN5_GOSHI DNA (cytosine-5)-methyltransferase OS=Gossypium hirsutum OX=3635 GN=LOC107959775 PE=3 SV=1	1589
	tr|A0A1S3U901|	A0A1S3U901_VIGRR DNA (cytosine-5)-methyltransferase OS=Vigna radiata var. radiata OX=3916 GN=LOC106762895 PE=3 SV=1	1521
	tr|A0A0R0JIK5|	A0A0R0JIK5_SOYBN DNA (cytosine-5)-methyltransferase OS=Glycine max OX=3847 GN=100797667 PE=3 SV=1	1445
	tr|A0A6J0LHP8|	A0A6J0LHP8_RAPSA DNA (cytosine-5)-methyltransferase OS=Raphanus sativus OX=3726 GN=LOC108829897 PE=3 SV=1	1512
	tr|A0A6J0JXU1|	A0A6J0JXU1_RAPSA DNA (cytosine-5)-methyltransferase OS=Raphanus sativus OX=3726 GN=LOC108812222 PE=3 SV=1	1532
	tr|A0A6J0NDF4|	A0A6J0NDF4_RAPSA DNA (cytosine-5)-methyltransferase OS=Raphanus sativus OX=3726 GN=LOC108853226 PE=3 SV=1	1507
	tr|A0A6P4DCE0|	A0A6P4DCE0_ARADU DNA (cytosine-5)-methyltransferase OS=Arachis duranensis OX=130453 GN=LOC107489734 PE=3 SV=1	1556
	tr|A0A0R0K9Z7|	A0A0R0K9Z7_SOYBN DNA (cytosine-5)-methyltransferase OS=Glycine max OX=3847 GN=100802765 PE=3 SV=1	1495
	tr|A0A6P4MK84|	A0A6P4MK84_GOSAR DNA (cytosine-5)-methyltransferase OS=Gossypium arboreum OX=29729 GN=LOC108460481 PE=3 SV=1	1585
	tr|A0A3Q0EYP6|	A0A3Q0EYP6_VIGRR DNA (cytosine-5)-methyltransferase OS=Vigna radiata var. radiata OX=3916 GN=LOC106757981 PE=3 SV=1	1580
	tr|A0A438KJS3|	A0A438KJS3_VITVI DNA (cytosine-5)-methyltransferase OS=Vitis vinifera OX=29760 GN=MET1B_1 PE=3 SV=1	1530
	tr|A0A1Q1N5E0|	A0A1Q1N5E0_9BRAS DNA (cytosine-5)-methyltransferase OS=Boechera divaricarpa OX=115915 GN=MET1 PE=2 SV=1	1546
	tr|A0A1Q1N6E3|	A0A1Q1N6E3_BOEHO DNA (cytosine-5)-methyltransferase OS=Boechera holboellii OX=93890 GN=MET1 PE=3 SV=1	1546
	tr|A0A438F5J8|	A0A438F5J8_VITVI DNA (cytosine-5)-methyltransferase OS=Vitis vinifera OX=29760 GN=MET1A_4 PE=3 SV=1	1349
	tr|A0A438F5K0|	A0A438F5K0_VITVI DNA (cytosine-5-)-methyltransferase OS=Vitis vinifera OX=29760 GN=MET1A_1 PE=3 SV=1	1138
	tr|A0A803PJE2|	A0A803PJE2_CANSA Cytosine-specific methyltransferase OS=Cannabis sativa OX=3483 PE=3 SV=1	2030
	tr|A0A2P5B9G3|	A0A2P5B9G3_PARAD DNA (cytosine-5)-methyltransferase OS=Parasponia andersonii OX=3476 GN=PanWU01x14_259070 PE=3 SV=1	1553
	tr|A0A2P5ALY0|	A0A2P5ALY0_TREOI DNA (cytosine-5)-methyltransferase OS=Trema orientale OX=63057 GN=TorRG33x02_347180 PE=3 SV=1	1554
	tr|A0A7J6IA83|	A0A7J6IA83_CANSA DNA (cytosine-5)-methyltransferase OS=Cannabis sativa OX=3483 GN=F8388_005878 PE=3 SV=1	1563
Domains Rearranged Methyltransferase (DRM)	sp|Q9M548|	DRM2_ARATH DNA (cytosine-5)-methyltransferase DRM2 OS=Arabidopsis thaliana OX=3702 GN=DRM2 PE=1 SV=1	626
	sp|Q9LXE5|	DRM1L_ARATH DNA (cytosine-5)-methyltransferase DRM1 OS=Arabidopsis thaliana OX=3702 GN=DRM1 PE=3 SV=2	624
	tr|G7KC46|	G7KC46_MEDTR DNA (Cytosine-5)-methyltransferase DRM1/2 OS=Medicago truncatula OX=3880 GN=11415587 PE=3 SV=2	590
	tr|B9GI45|	B9GI45_POPTR SAM-dependent MTase DRM-type domain-containing protein OS=Populus trichocarpa OX=3694 GN=POPTR_001G347000 PE=3 SV=2	634
	tr|I1K1I2|	I1K1I2_SOYBN SAM-dependent MTase DRM-type domain-containing protein OS=Glycine max OX=3847 GN=100785996 PE=3 SV=1	590
	tr|G7KHJ5|	G7KHJ5_MEDTR DNA (Cytosine-5)-methyltransferase DRM1/2 OS=Medicago truncatula OX=3880 GN=11421073 PE=3 SV=1	588
	tr|A0A059AFS6|	A0A059AFS6_EUCGR SAM-dependent MTase DRM-type domain-containing protein OS=Eucalyptus grandis OX=71139 GN=EUGRSUZ_J02221 PE=3 SV=1	598
	tr|B9S630|	B9S630_RICCO SAM-dependent MTase DRM-type domain-containing protein OS=Ricinus communis OX=3988 GN=RCOM_1063380 PE=3 SV=1	686
	tr|A0A5N5GHK4|	A0A5N5GHK4_9ROSA DNA (Cytosine-5)-methyltransferase DRM2-like OS=Pyrus ussuriensis x Pyrus communis OX=2448454 GN=D8674_018256 PE=3 SV=1	740
	tr|A0A1S2XH24|	A0A1S2XH24_CICAR DNA (Cytosine-5)-methyltransferase DRM2 OS=Cicer arietinum OX=3827 GN=LOC101492710 PE=3 SV=1	589
	tr|A0A072UNX7|	A0A072UNX7_MEDTR DNA (Cytosine-5)-methyltransferase DRM1/2 OS=Medicago truncatula OX=3880 GN=11415587 PE=3 SV=1	528
	tr|A0A1S3TEF9|	A0A1S3TEF9_VIGRR DNA (Cytosine-5)-methyltransferase DRM2 OS=Vigna radiata var. radiata OX=3916 GN=LOC106754617 PE=3 SV=1	571
	tr|A0A6J0KEY6|	A0A6J0KEY6_RAPSA DNA (Cytosine-5)-methyltransferase DRM2-like OS=Raphanus sativus OX=3726 GN=LOC108817778 PE=3 SV=1	605
	tr|A0A6J0L1A2|	A0A6J0L1A2_RAPSA DNA (Cytosine-5)-methyltransferase DRM1 OS=Raphanus sativus OX=3726 GN=LOC108824499 PE=3 SV=1	638
	tr|A0A6P3ZKH9|	A0A6P3ZKH9_ZIZJJ LOW QUALITY PROTEIN: DNA (Cytosine-5)-methyltransferase DRM2 OS=Ziziphus jujuba OX=326968 GN=LOC107415301 PE=3 SV=1	586
	tr|A0A6P4DFN0|	A0A6P4DFN0_ARADU DNA (Cytosine-5)-methyltransferase DRM2 isoform X1 OS=Arachis duranensis OX=130453 GN=LOC107490066 PE=3 SV=1	631
	tr|A0A6P4DHT5|	A0A6P4DHT5_ARADU DNA (Cytosine-5)-methyltransferase DRM2 isoform X3 OS=Arachis duranensis OX=130453 GN=LOC107490066 PE=3 SV=1	607
	tr|A0A6P4DL58|	A0A6P4DL58_ARADU DNA (Cytosine-5)-methyltransferase DRM2 isoform X4 OS=Arachis duranensis OX=130453 GN=LOC107490066 PE=3 SV=1	603
	tr|A0A6P4DD33|	A0A6P4DD33_ARADU DNA (Cytosine-5)-methyltransferase DRM2 isoform X2 OS=Arachis duranensis OX=130453 GN=LOC107490066 PE=3 SV=1	627
	tr|A0A6P5NP81|	A0A6P5NP81_ARADU DNA (Cytosine-5)-methyltransferase DRM2 isoform X5 OS=Arachis duranensis OX=130453 GN=LOC107490066 PE=3 SV=1	582
	tr|A0A6P5NQH6|	A0A6P5NQH6_ARADU DNA (Cytosine-5)-methyltransferase DRM2 isoform X6 OS=Arachis duranensis OX=130453 GN=LOC107490066 PE=3 SV=1	539
	tr|A0A438JID4|	A0A438JID4_VITVI DNA (Cytosine-5)-methyltransferase DRM2 OS=Vitis vinifera OX=29760 GN=DRM2_0 PE=3 SV=1	775
	tr|G7IVR5|	G7IVR5_MEDTR DNA (Cytosine-5)-methyltransferase DRM1/2 OS=Medicago truncatula OX=3880 GN=11419444 PE=3 SV=2	590
	tr|A0A2I4FAH8|	A0A2I4FAH8_JUGRE DNA (Cytosine-5)-methyltransferase DRM2-like isoform X1 OS=Juglans regia OX=51240 GN=LOC108997025 PE=3 SV=1	595
	tr|A0A2P6S5M2|	A0A2P6S5M2_ROSCH Putative DNA (Cytosine-5-)-methyltransferase OS=Rosa chinensis OX=74649 GN=RchiOBHm_Chr2g0172381 PE=3 SV=1	597
	tr|A0A445LJ49|	A0A445LJ49_GLYSO DNA (Cytosine-5)-methyltransferase DRM2 isoform A OS=Glycine soja OX=3848 GN=D0Y65_002869 PE=3 SV=1	537
	tr|A0A445FAK4|	A0A445FAK4_GLYSO DNA (Cytosine-5)-methyltransferase DRM2 isoform B OS=Glycine soja OX=3848 GN=D0Y65_050068 PE=3 SV=1	573
	tr|A0A445LJA7|	A0A445LJA7_GLYSO DNA (Cytosine-5)-methyltransferase DRM2 isoform B OS=Glycine soja OX=3848 GN=D0Y65_002869 PE=3 SV=1	531
	tr|A0A2K3NMB0|	A0A2K3NMB0_TRIPR DNA (Cytosine-5)-methyltransferase drm2-like protein OS=Trifolium pratense OX=57577 GN=L195_g000601 PE=3 SV=1	650
	tr|A0A4U5P4D5|	A0A4U5P4D5_POPAL DNA (Cytosine-5)-methyltransferase DRM1 isoform X1 OS=Populus alba OX=43335 GN=D5086_0000232170 PE=3 SV=1	634
	tr|A0A836YFY3|	A0A836YFY3_9ROSI DNA (Cytosine-5)-methyltransferase DRM OS=Salix suchowensis OX=1278906 GN=IMY05_001G0220700 PE=3 SV=1	701
	tr|F6KFY8|	F6KFY8_GOSHI DNA (Cytosine-5)-methyltransferase DRM1-like OS=Gossypium hirsutum OX=3635 GN=LOC107888680 PE=2 SV=1	636
	tr|A0A1S3V5E6|	A0A1S3V5E6_VIGRR DNA (Cytosine-5)-methyltransferase DRM2 OS=Vigna radiata var. radiata OX=3916 GN=LOC106771864 PE=3 SV=1	588
	tr|A0A1U8I3J5|	A0A1U8I3J5_GOSHI DNA (Cytosine-5)-methyltransferase DRM1-like OS=Gossypium hirsutum OX=3635 GN=LOC107892277 PE=3 SV=1	636
	tr|A0A1U8PME7|	A0A1U8PME7_GOSHI DNA (Cytosine-5)-methyltransferase DRM1-like isoform X1 OS=Gossypium hirsutum OX=3635 GN=LOC107959859 PE=3 SV=1	693
	tr|A0A1U8LGT7|	A0A1U8LGT7_GOSHI DNA (Cytosine-5)-methyltransferase DRM1-like isoform X1 OS=Gossypium hirsutum OX=3635 GN=LOC107926095 PE=3 SV=1	693
	tr|A0A2I4FAH2|	A0A2I4FAH2_JUGRE DNA (Cytosine-5)-methyltransferase DRM2-like isoform X2 OS=Juglans regia OX=51240 GN=LOC108997025 PE=3 SV=1	546
	tr|A0A6P5SK83|	A0A6P5SK83_PRUAV DNA (Cytosine-5)-methyltransferase DRM2-like OS=Prunus avium OX=42229 GN=LOC110759593 PE=3 SV=1	582
	tr|A0A371G0P0|	A0A371G0P0_MUCPR DNA (Cytosine-5)-methyltransferase DRM2 (Fragment) OS=Mucuna pruriens OX=157652 GN=DRM2 PE=3 SV=1	552
	tr|A0A6P8EFP3|	A0A6P8EFP3_PUNGR DNA (Cytosine-5)-methyltransferase DRM2 OS=Punica granatum OX=22663 GN=LOC116214335 PE=3 SV=1	580
	tr|A0A087G753|	A0A087G753_ARAAL Dna (Cytosine-5)-methyltransferase drm2 OS=Arabis alpina OX=50452 GN=AALP_AA8G148700 PE=3 SV=1	600
	tr|A0A445FAL0|	A0A445FAL0_GLYSO DNA (Cytosine-5)-methyltransferase DRM2 isoform A OS=Glycine soja OX=3848 GN=D0Y65_050068 PE=3 SV=1	580
	tr|A0A8B8PAK4|	A0A8B8PAK4_9MYRT LOW QUALITY PROTEIN: DNA (Cytosine-5)-methyltransferase DRM2-like OS=Rhodamnia argentea OX=178133 GN=LOC115741304 PE=3 SV=1	644
	tr|A0A0B2QTW1|	A0A0B2QTW1_GLYSO DNA (Cytosine-5)-methyltransferase DRM2 OS=Glycine soja OX=3848 GN=glysoja_029808 PE=3 SV=1	580
	tr|A0A396IIT5|	A0A396IIT5_MEDTR Putative DNA (Cytosine-5-)-methyltransferase OS=Medicago truncatula OX=3880 GN=MtrunA17_Chr3g0080571 PE=3 SV=1	609
	tr|A0A061EJF8|	A0A061EJF8_THECC DNA (Cytosine-5)-methyltransferase DRM1/2 isoform 1 OS=Theobroma cacao OX=3641 GN=TCM_016907 PE=3 SV=1	637
	tr|A0A445KI88|	A0A445KI88_GLYSO DNA (Cytosine-5)-methyltransferase DRM2 isoform A OS=Glycine soja OX=3848 GN=D0Y65_010889 PE=3 SV=1	590
	tr|A0A7J6DY32|	A0A7J6DY32_CANSA SAM-dependent MTase DRM-type domain-containing protein OS=Cannabis sativa OX=3483 GN=F8388_015001 PE=3 SV=1	1487
	tr|A0A2P5EF95|	A0A2P5EF95_TREOI SAM-dependent methyltransferase DRM OS=Trema orientale OX=63057 GN=TorRG33x02_199710 PE=3 SV=1	605
	tr|A0A2P5B7U8|	A0A2P5B7U8_PARAD DNA methylase, C-5 cytosine-specific, active site OS=Parasponia andersonii OX=3476 GN=PanWU01x14_263220 PE=3 SV=1	537
	tr|A0A2P5FMH7|	A0A2P5FMH7_TREOI DNA methylase, C-5 cytosine-specific, active site OS=Trema orientale OX=63057 GN=TorRG33x02_052170 PE=3 SV=1	537
	tr|A0A2P5BUM3|	A0A2P5BUM3_PARAD SAM-dependent methyltransferase OS=Parasponia andersonii OX=3476 GN=PanWU01x14_208880 PE=3 SV=1	606
	tr|A0A7J6GF98|	A0A7J6GF98_CANSA Uncharacterized protein OS=Cannabis sativa OX=3483 GN=F8388_021201 PE=3 SV=1	654

## Sheet: Supplementary Table S3
Supplementary Table S3. RT-qPCR results summarized as gene expression level (Log2 fold-change) in respect to the viroid-free hop plants.
Gene	Hop plants infected with
	Citrus bark cracking viroid (CBCVd)	Hop latent viroid (HLVd)	Hop stunt viroid (HSVd)	CBCVd+HLVd	CBCVd+HLVd+HSVd
CMT	-0.32	-0.88	-0.47	-0.37	1.19*
DME	-0.27	-0.51	-0.96	-0.4	1.07*
DNMT	0.34*	-0.58	0.29	-0.4	0.38*
DRM	-0.47	-0.34	-0.6	-0.28	1.19*
*Indication of a statistically significant result, p-value < 0.05

## Sheet: Supplementary Table S4
Supplementary Table S4. Primers used in qPCR.
Target	Forward	Reverse	Product size [bp]
CBCVd	TCACTGGCGTCCAGCACC	AGGAAGAAGCGACGATCGG	80
HLVd	CGGCGACCTGAAGTTGCT	TTCCAACTCCGGCTGGTGT	82
HSVd	CGGTGCTCTGGAGTAGAGGC	GTGATGCCACCGGTCGC	104
DRH1	CCAACCTACTGGGCTTCGAC	CAGAATGGGTATGATCGGGC	51
CMT	GCCTGCATGTGAAAGCTTAGAG	ACAACTTCTCCCATTCCCTCAG	101
DME	TGTTCCCCCAGATGAAGCAAG	CGCACACACTCCACACTTTTC	140
DNMT	TGAATCCAAGAGCTGCCATG	TCAGCCTCGTAGTAGTAGCTTG	72
DRM	ATGGATGAATGCCGGAAGTG	TGATTCCACCTCCCCTTGTG	124
